# Supplementary material for: Substrate selectivity and inhibition of histidine JmjC hydroxylases MINA53 and NO66
Source: Royal Society of Chemistry journal article supplement (doi:10.1039/d2cb00182a), 2023-01-01
Supplement: d2cb00182a1.pdf [file d2cb00182a1.pdf]

# Supplementary Information

## Substrate selectivity and inhibition of histidine JmjC hydroxylases

### MINA53 and NO66

Vildan A. Türkmen,<sup>a</sup> Jordi C. J. Hintzen,<sup>a</sup> Anthony Tumber,<sup>b</sup> Laust Moesgaard,<sup>a</sup> Eidarus Salah,<sup>b</sup>  
Jacob Kongsted,<sup>a</sup> Christopher J. Schofield,<sup>\*b</sup> and Jasmin Mecinović<sup>\*a</sup>

<sup>a</sup> Department of Physics, Chemistry and Pharmacy, University of Southern Denmark, Campusvej 55, 5230 Odense, Denmark

<sup>b</sup> Department of Chemistry and the Ineos Oxford Institute for Antimicrobial Research, Chemistry Research Laboratory, University of Oxford, 12 Mansfield Road, OX1 3TA Oxford, United Kingdom

# Table of Contents

|                                               |    |
|-----------------------------------------------|----|
| 1. Characterisation of Rpl peptides .....     | 3  |
| 2. Turnover assays with MINA53 and NO66 ..... | 5  |
| 3. Inhibition supporting figure .....         | 13 |
| 4. Molecular dynamics simulations .....       | 13 |

## 1. Characterisation of Rpl peptides

**Table S1.** Characterisation of Rpl27a peptides. All peptides were prepared with C-terminal amides.

| Entry | Peptide                  | Sequence            | Formula                                                             | m/z        | m/z     | Purity |
|-------|--------------------------|---------------------|---------------------------------------------------------------------|------------|---------|--------|
|       |                          |                     |                                                                     | Calculated | Found   |        |
| 1     | (L)His39                 | GRGNAGGLHHRINFDKYHP | C <sub>100</sub> H <sub>148</sub> N <sub>38</sub> O <sub>25</sub>   | 2282.15    | 2282.14 | >99%   |
| 2     | (D)His39                 | GRGNAGGLHHRINFDKYHP | C <sub>100</sub> H <sub>148</sub> N <sub>38</sub> O <sub>25</sub>   | 2282.15    | 2282.19 | >99%   |
| 3     | N <sub>α</sub> -Me-His39 | GRGNAGGLHHRINFDKYHP | C <sub>101</sub> H <sub>150</sub> N <sub>38</sub> O <sub>25</sub>   | 2296.16    | 2297.62 | >99%   |
| 4     | 2PyrA39                  | GRGNAGGLHHRINFDKYHP | C <sub>102</sub> H <sub>149</sub> N <sub>37</sub> O <sub>25</sub>   | 2293.15    | 2293.28 | ~94%   |
| 5     | 4ThiA39                  | GRGNAGGLHHRINFDKYHP | C <sub>100</sub> H <sub>147</sub> N <sub>37</sub> O <sub>25</sub> S | 2299.11    | 2299.81 | ~98%   |
| 6     | N <sup>T</sup> -Me-His39 | GRGNAGGLHHRINFDKYHP | C <sub>100</sub> H <sub>148</sub> N <sub>38</sub> O <sub>25</sub>   | 2296.16    | 2296.88 | >99%   |
| 7     | N <sup>L</sup> -Me-His39 | GRGNAGGLHHRINFDKYHP | C <sub>100</sub> H <sub>148</sub> N <sub>38</sub> O <sub>25</sub>   | 2296.16    | 2298.06 | >99%   |
| 8     | 3PyrA39                  | GRGNAGGLHHRINFDKYHP | C <sub>102</sub> H <sub>149</sub> N <sub>37</sub> O <sub>25</sub>   | 2293.15    | 2295.04 | ~98%   |
| 9     | 4PyrA39                  | GRGNAGGLHHRINFDKYHP | C <sub>102</sub> H <sub>149</sub> N <sub>37</sub> O <sub>25</sub>   | 2293.15    | 2293.94 | >99%   |
| 10    | TetrA39                  | GRGNAGGLHHRINFDKYHP | C <sub>98</sub> H <sub>146</sub> N <sub>40</sub> O <sub>25</sub>    | 2284.14    | 2293.94 | >99%   |
| 11    | 4-TriaA39                | GRGNAGGLHHRINFDKYHP | C <sub>99</sub> H <sub>147</sub> N <sub>39</sub> O <sub>25</sub>    | 2283.14    | 2284.14 | ~98%   |
| 12    | Orn39                    | GRGNAGGLHHRINFDKYHP | C <sub>99</sub> H <sub>151</sub> N <sub>37</sub> O <sub>25</sub>    | 2259.17    | 2260.43 | ~95%   |
| 13    | 1-TriaA39                | GRGNAGGLHHRINFDKYHP | C <sub>98</sub> H <sub>146</sub> N <sub>40</sub> O <sub>25</sub>    | 2283.14    | 2283.15 | >99%   |
| 14    | Gln39                    | GRGNAGGLHHRINFDKYHP | C <sub>99</sub> H <sub>149</sub> N <sub>37</sub> O <sub>26</sub>    | 2274.51    | 2273.17 | >99%   |
| 15    | hGln39                   | GRGNAGGLHHRINFDKYHP | C <sub>100</sub> H <sub>151</sub> N <sub>37</sub> O <sub>26</sub>   | 2288.54    | 2287.23 | >99%   |
| 16    | Arg39                    | GRGNAGGLHHRINFDKYHP | C <sub>100</sub> H <sub>153</sub> N <sub>39</sub> O <sub>25</sub>   | 2302.57    | 2302.41 | >99%   |
| 17    | Cit39                    | GRGNAGGLHHRINFDKYHP | C <sub>100</sub> H <sub>152</sub> N <sub>38</sub> O <sub>26</sub>   | 2303.56    | 2302.40 | >99%   |
| 18    | Asn39                    | GRGNAGGLHHRINFDKYHP | C <sub>98</sub> H <sub>149</sub> N <sub>37</sub> O <sub>26</sub>    | 2259.49    | 2259.18 | >99%   |

**Table S2.** Characterisation of Rpl8 peptides. All peptides were prepared with C-terminal amides.

| Entry | Peptide                | Sequence                      | Formula                                                            | m/z        |         | Purity |
|-------|------------------------|-------------------------------|--------------------------------------------------------------------|------------|---------|--------|
|       |                        |                               |                                                                    | Calculated | Found   |        |
| 1     | (L)His216              | NPVEHPFGGGN <b>H</b> QHIGKPST | C <sub>92</sub> H <sub>136</sub> N <sub>30</sub> O <sub>28</sub>   | 2110.01    | 2109.52 | >99%   |
| 2     | (D)His216              | NPVEHPFGGGN <b>H</b> QHIGKPST | C <sub>92</sub> H <sub>136</sub> N <sub>30</sub> O <sub>28</sub>   | 2110.01    | 2110.81 | ~95%   |
| 3     | N $\alpha$ -Me-His216  | NPVEHPFGGGN <b>H</b> QHIGKPST | C <sub>93</sub> H <sub>138</sub> N <sub>30</sub> O <sub>28</sub>   | 2124.03    | 2123.65 | ~95%   |
| 4     | 2PyrA216               | NPVEHPFGGGN <b>H</b> QHIGKPST | C <sub>94</sub> H <sub>137</sub> N <sub>29</sub> O <sub>28</sub>   | 2121.02    | 2120.50 | >99%   |
| 5     | 4ThiA216               | NPVEHPFGGGN <b>H</b> QHIGKPST | C <sub>92</sub> H <sub>135</sub> N <sub>29</sub> O <sub>28</sub> S | 2126.98    | 2126.01 | >99%   |
| 6     | N $^{\tau}$ -Me-His216 | NPVEHPFGGGN <b>H</b> QHIGKPST | C <sub>93</sub> H <sub>138</sub> N <sub>30</sub> O <sub>28</sub>   | 2124.03    | 2123.39 | >99%   |
| 7     | N $^{\tau}$ -Me-His216 | NPVEHPFGGGN <b>H</b> QHIGKPST | C <sub>93</sub> H <sub>138</sub> N <sub>30</sub> O <sub>28</sub>   | 2124.03    | 2123.02 | >99%   |
| 8     | 3PyrA216               | NPVEHPFGGGN <b>H</b> QHIGKPST | C <sub>94</sub> H <sub>137</sub> N <sub>29</sub> O <sub>28</sub>   | 2121.02    | 2120.72 | >99%   |
| 9     | 4PyrA216               | NPVEHPFGGGN <b>H</b> QHIGKPST | C <sub>94</sub> H <sub>137</sub> N <sub>29</sub> O <sub>28</sub>   | 2121.02    | 2120.72 | ~95%   |
| 10    | TetrA216               | NPVEHPFGGGN <b>H</b> QHIGKPST | C <sub>90</sub> H <sub>134</sub> N <sub>32</sub> O <sub>28</sub>   | 2112.00    | 2120.72 | ~97%   |
| 11    | 4-TriaA216             | NPVEHPFGGGN <b>H</b> QHIGKPST | C <sub>91</sub> H <sub>135</sub> N <sub>31</sub> O <sub>28</sub>   | 2112.01    | 2111.14 | >99%   |
| 12    | Orn216                 | NPVEHPFGGGN <b>H</b> QHIGKPST | C <sub>91</sub> H <sub>139</sub> N <sub>29</sub> O <sub>28</sub>   | 2087.03    | 2186.23 | >99%   |
| 13    | 1-TriaA216             | NPVEHPFGGGN <b>H</b> QHIGKPST | C <sub>91</sub> H <sub>135</sub> N <sub>31</sub> O <sub>28</sub>   | 2112.01    | 2112.42 | >99%   |
| 14    | Gln216                 | NPVEHPFGGGN <b>H</b> QHIGKPST | C <sub>91</sub> H <sub>137</sub> N <sub>29</sub> O <sub>29</sub>   | 2101.01    | 2100.37 | >99%   |
| 15    | hGln216                | NPVEHPFGGGN <b>H</b> QHIGKPST | C <sub>92</sub> H <sub>139</sub> N <sub>29</sub> O <sub>29</sub>   | 2115.03    | 2114.28 | ~91%   |
| 16    | Arg216                 | NPVEHPFGGGN <b>H</b> QHIGKPST | C <sub>92</sub> H <sub>141</sub> N <sub>31</sub> O <sub>28</sub>   | 2129.06    | 2128.58 | >99%   |
| 17    | Cit216                 | NPVEHPFGGGN <b>H</b> QHIGKPST | C <sub>92</sub> H <sub>130</sub> N <sub>30</sub> O <sub>29</sub>   | 2130.04    | 2129.45 | >99%   |
| 18    | Asn216                 | NPVEHPFGGGN <b>H</b> QHIGKPST | C <sub>90</sub> H <sub>135</sub> N <sub>29</sub> O <sub>29</sub>   | 2087.00    | 2086.50 | ~94%   |

## 2. Turnover assays with MINA53 and NO66

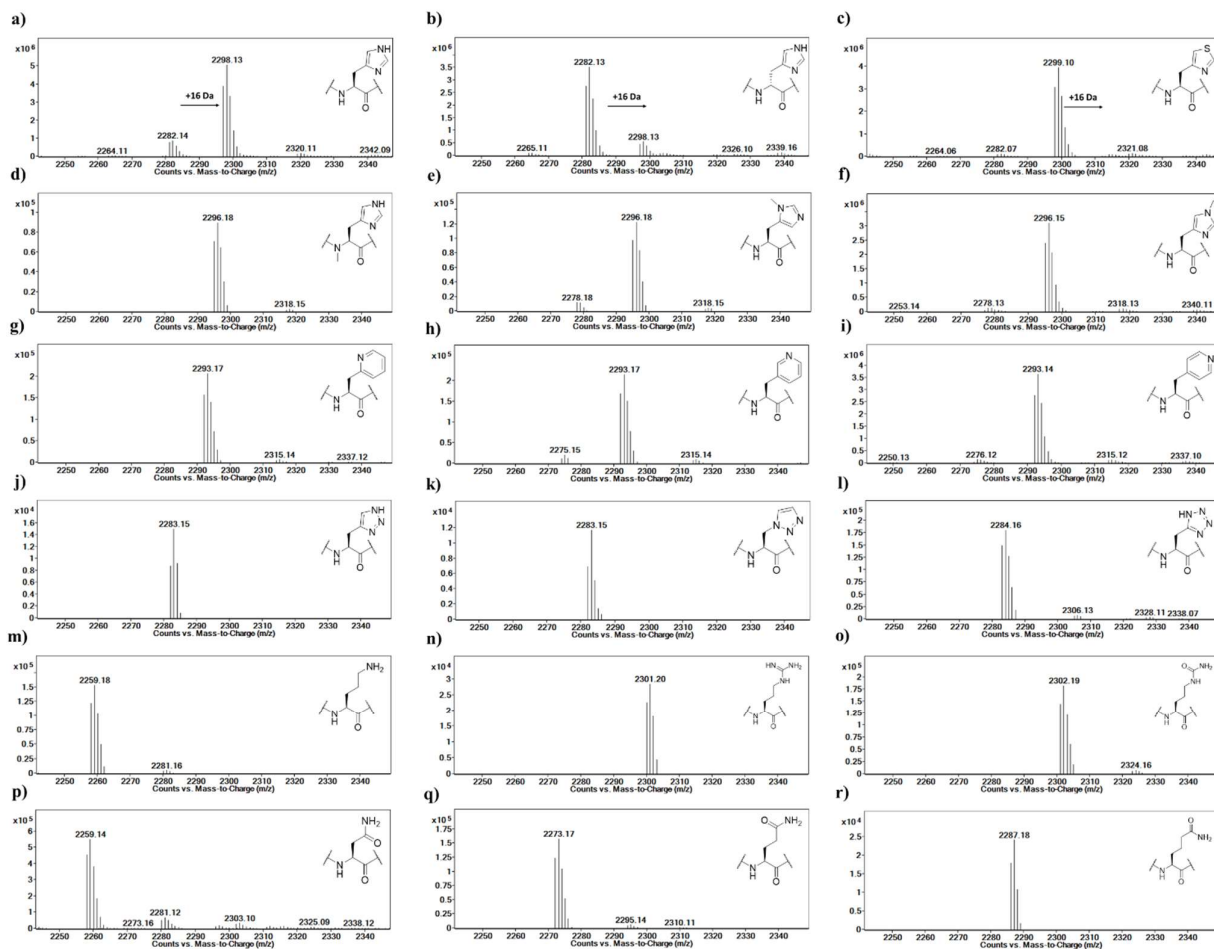

**Figure S1.** LC-MS data investigating the potential oxidation of Rpl27a-His39 peptides as catalysed by MINA53. a) Rpl27a-His39, b) Rpl27a-D-His39, c) Rpl27a-ThiA39, d) Rpl27a-N $_{\alpha}$ -His39, e) Rpl27a-N $^{\pi}$ -Me-His39, f) Rpl27a-N $^{\pi}$ -me-His39, g) Rpl27a-2PyrA39, h) Rpl27a-3PyrA39, i) Rpl27a-4PyrA39, j) Rpl27a-4-TriaA39, k) Rpl27a-1-TriaA39, l) Rpl27a-TetrA39, m) Rpl27a-Orn39, n) Rpl27a-Arg39 and o) Rpl27a-Cit39, p) Rpl27a-Asn39, q) Rpl27a-Gln39 and r) Rpl27a-hGln39. Conditions: 2  $\mu$ M MINA53, 10  $\mu$ M Rpl peptide, 100  $\mu$ M ascorbate, 10  $\mu$ M ferrous ammonium sulfate, 10  $\mu$ M 2OG, pH 7.5, 2 hours at room temperature.

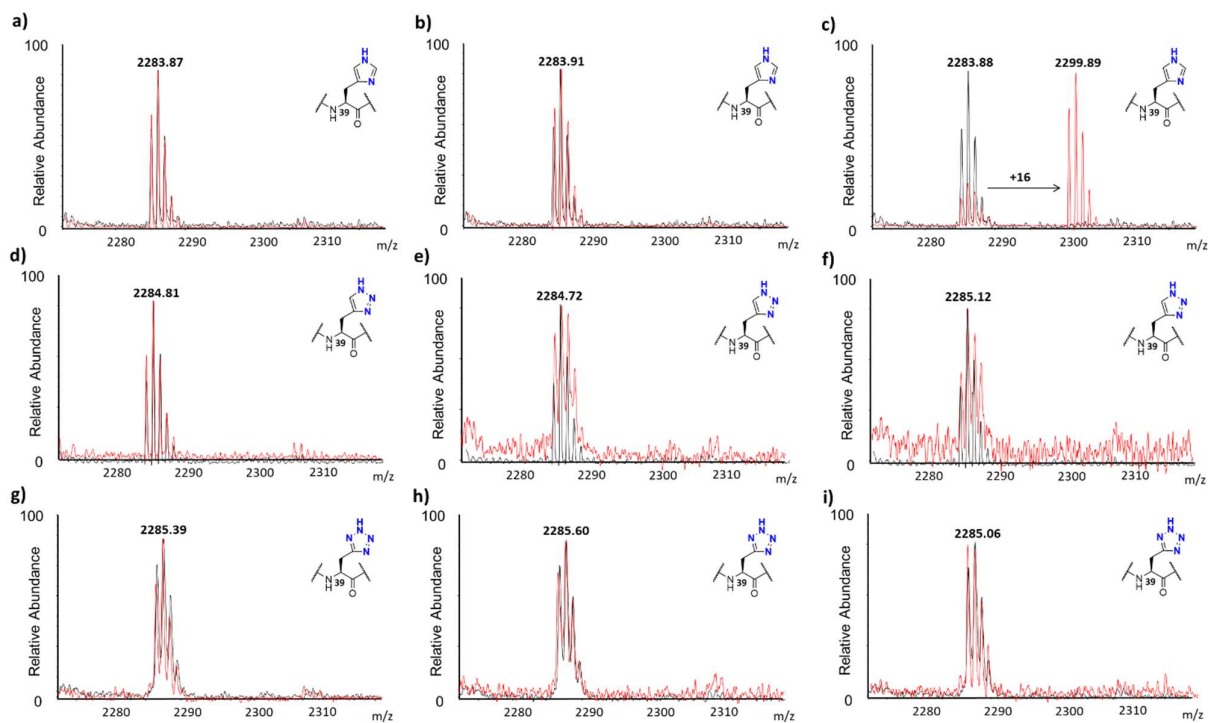

**Figure S2.** MALDI-TOF MS data investigating the pH dependency of Rpl27a in the presence of MINA53 in 50 mM HEPES at pH 4.5 (a, d and g), 6 (b, e and h) and 7.5 (c, f and i). a, b, c) Rpl27a-His39, d, e, f) Rpl27a-4-TriA and g, h, i) Rpl27a-TetrA. Control reactions in the absence of MINA53 are in black. Potential MINA53-catalysed reactions are in red.

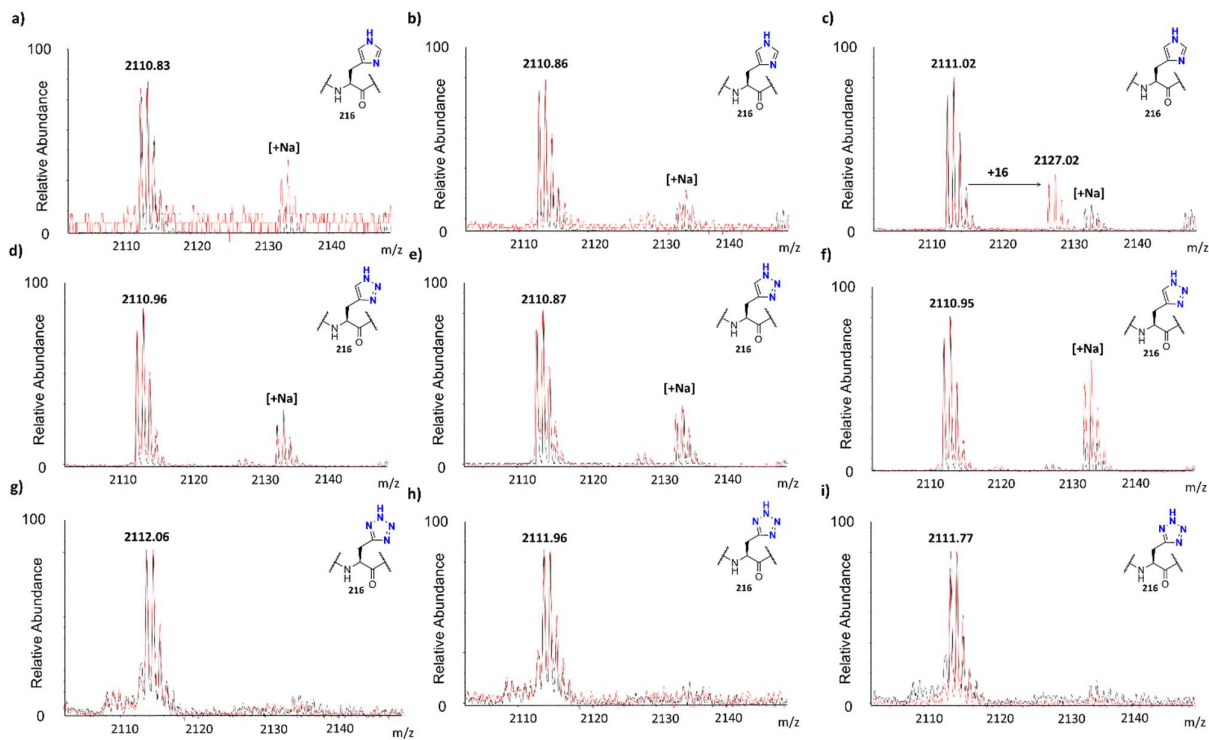

**Figure S3.** MALDI-TOF MS data investigating the pH dependency of Rpl8 in presence of NO66 in 50 mM HEPES at pH 4.5 (a, d and g), 6 (b, e and h) and 7.5 (c, f and i). a, b, c) Rpl8-His39, d, e, f) Rpl8-4-TriA and g, h, i) Rpl8-TetrA. Control reactions in the absence of NO66 are in black. Potential NO66-catalysed reactions are in red.

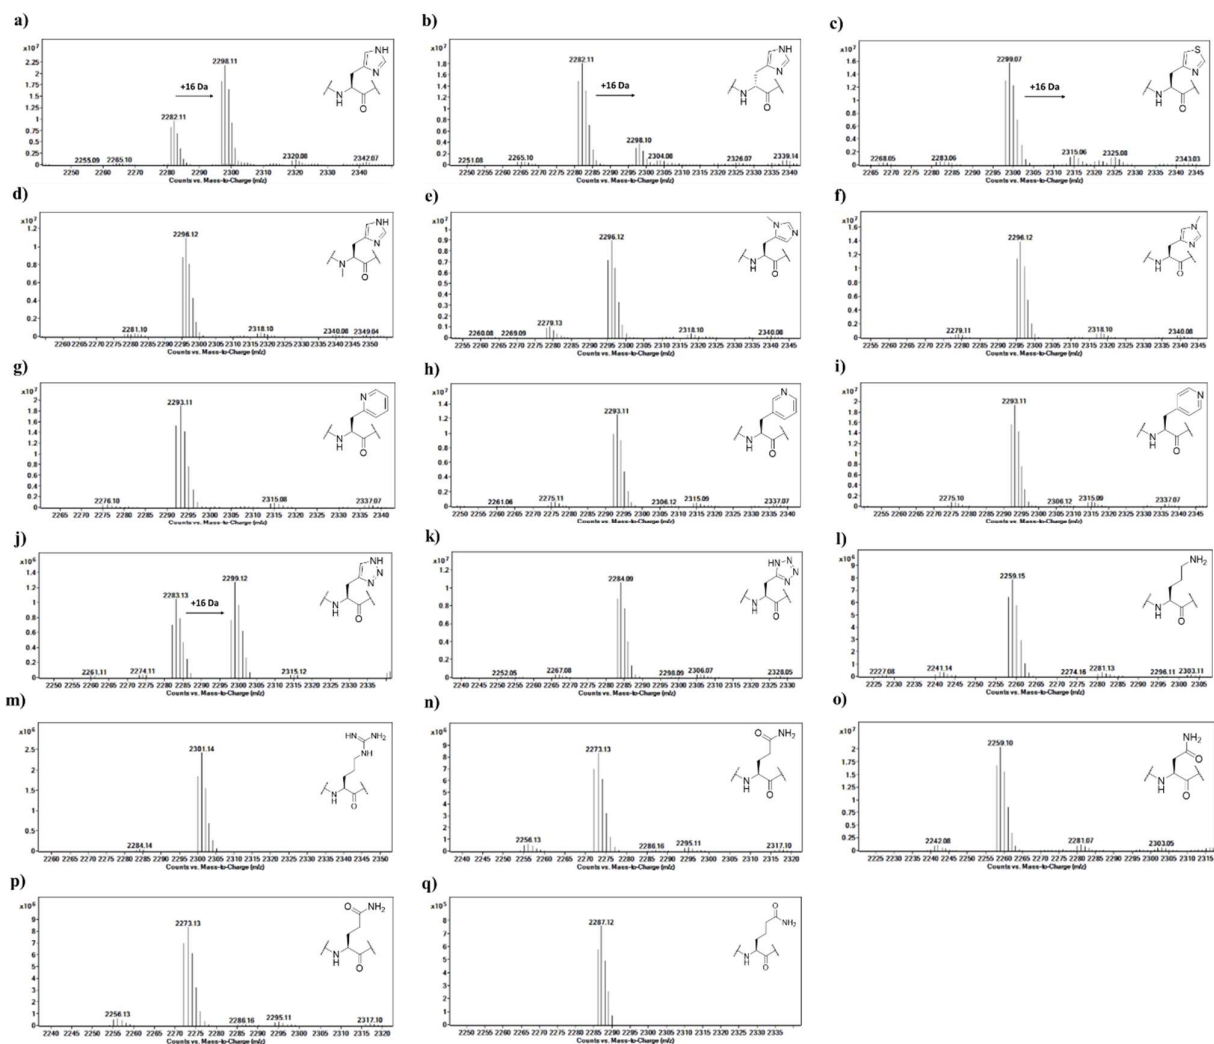

**Figure S4.** LC-MS data showing potential oxidation of Rpl27a-His39 peptides as catalysed by MINA53. a) Rpl27a-His39, b) Rpl27a-D-His39, c) Rpl27a-ThiA39, d) Rpl27a-N $\alpha$ -His39, e) Rpl27a-N $\pi$ -Me-His39, f) Rpl27a-N $\pi$ -me-His39, g) Rpl27a-2PyrA39, h) Rpl27a-3PyrA39, i) Rpl27a-4PyrA39, j) Rpl27a-4-TriaA39, k) Rpl27a-TetrA39, l) Rpl27a-Orn39, m) Rpl27a-Arg39 and n) Rpl27a-Cit39, o) Rpl27a-Asn39, p) Rpl27a-Gln39 and q) Rpl27a-hGln39. Conditions: 2  $\mu$ M MINA53, 50  $\mu$ M Rpl27a peptide, 100  $\mu$ M ascorbate, 10  $\mu$ M ferrous ammonium sulfate, 10  $\mu$ M 2OG, pH 7.5, 2 hours at room temperature. All reactions were analyzed by LC-MS with 3 blank injections of water between each assay sample to minimize ‘carry-over’.



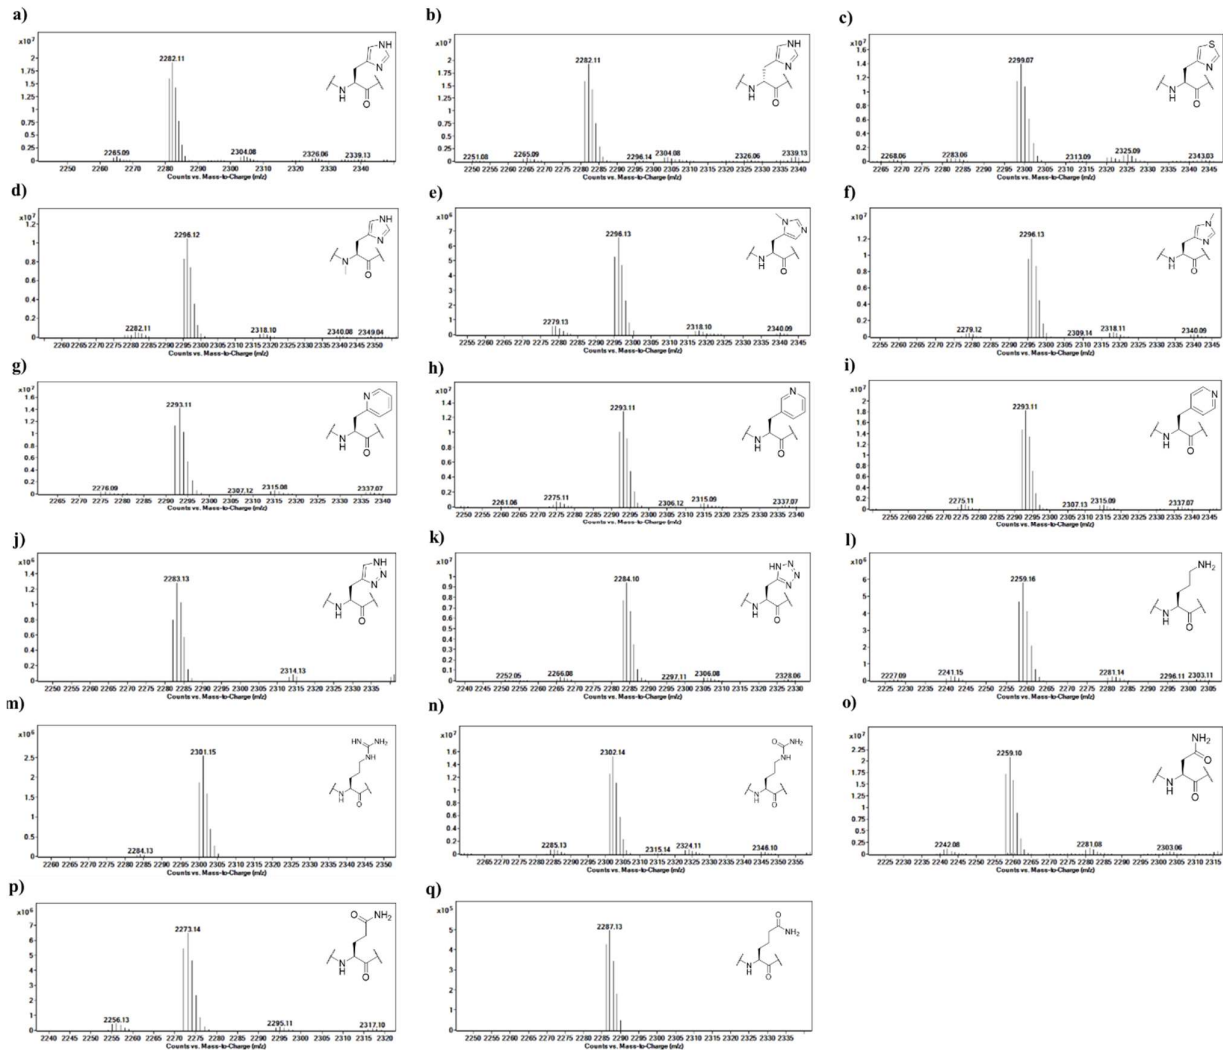

**Figure S5.** LC-MS data showing no-enzyme controls using Rpl27a-His39 peptides. a) Rpl27a-His39, b) Rpl27a-D-His39, c) Rpl27a-ThiA39, d) Rpl27a-N $\alpha$ -His39, e) Rpl27a-N $\epsilon$ -Me-His39, f) Rpl27a-N $\epsilon$ -me-His39, g) Rpl27a-2PyrA39, h) Rpl27a-3PyrA39, i) Rpl27a-4PyrA39, j) Rpl27a-4-TriaA39, k) Rpl27a-TetrA39, l) Rpl27a-Orn39, m) Rpl27a-Arg39 and n) Rpl27a-Cit39, o) Rpl27a-Asn39, p) Rpl27a-Gln39 and q) Rpl27a-hGln39. No enzyme control as enzyme reaction using 50  $\mu$ M Rpl27a peptides (as in Figure S4) acidified with final concentration of 1% formic acid (v/v). All reactions were analyzed by LC-MS with 3 blank injections of water 3 between each assay sample to minimize ‘carry-over’.

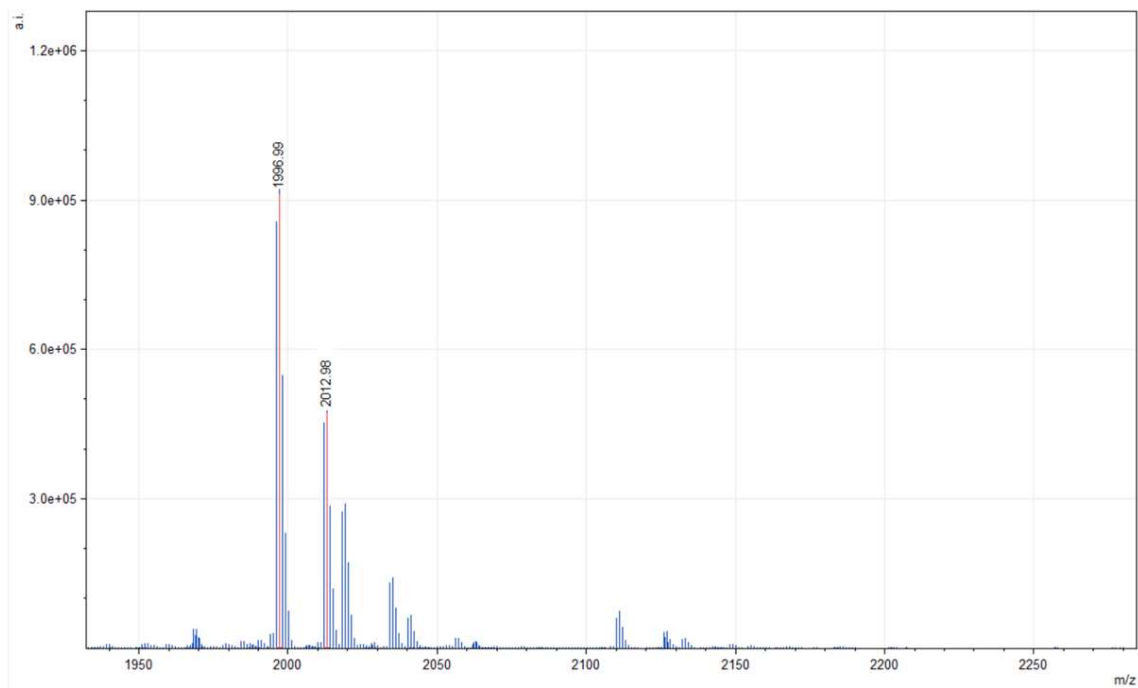

**Figure S6.** MALDI-TOF MS data showing evidence for hydroxylation (+16 Da) of the Rpl8-4-TriA216 peptide with NO66. This sample was used for fragmentation MALDI-TOF MS/MS analysis (Figure S8).

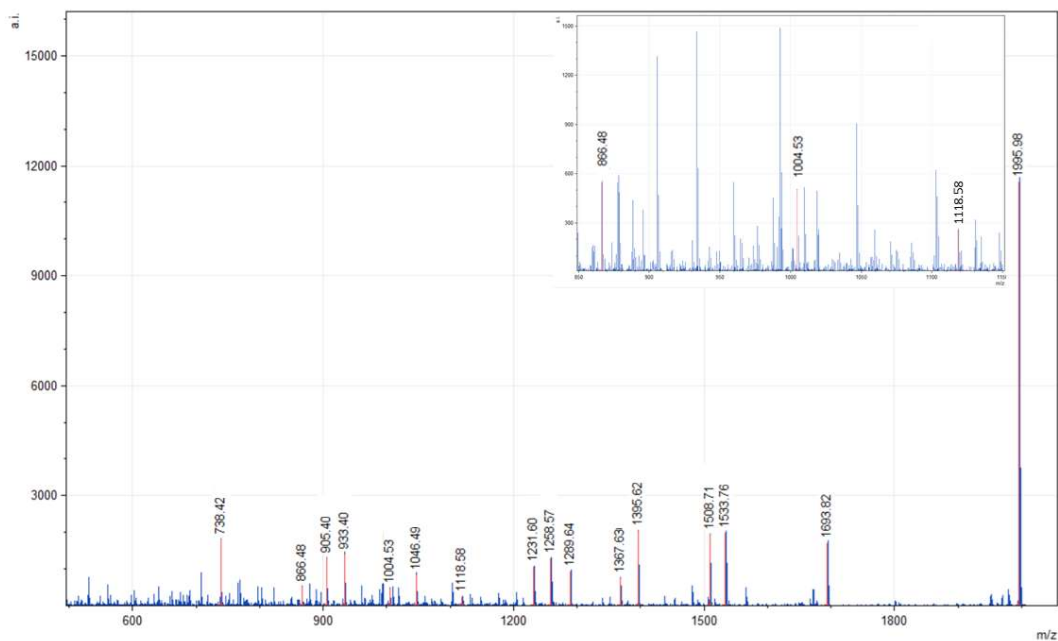

**Figure S7.** MALDI-TOF MS/MS fragmentation data for the unmodified Rpl8-4-TriA216 peptide. The inset shows a close up for the  $y_8'$ ,  $y_9'$  and  $y_{10}'$  peaks.

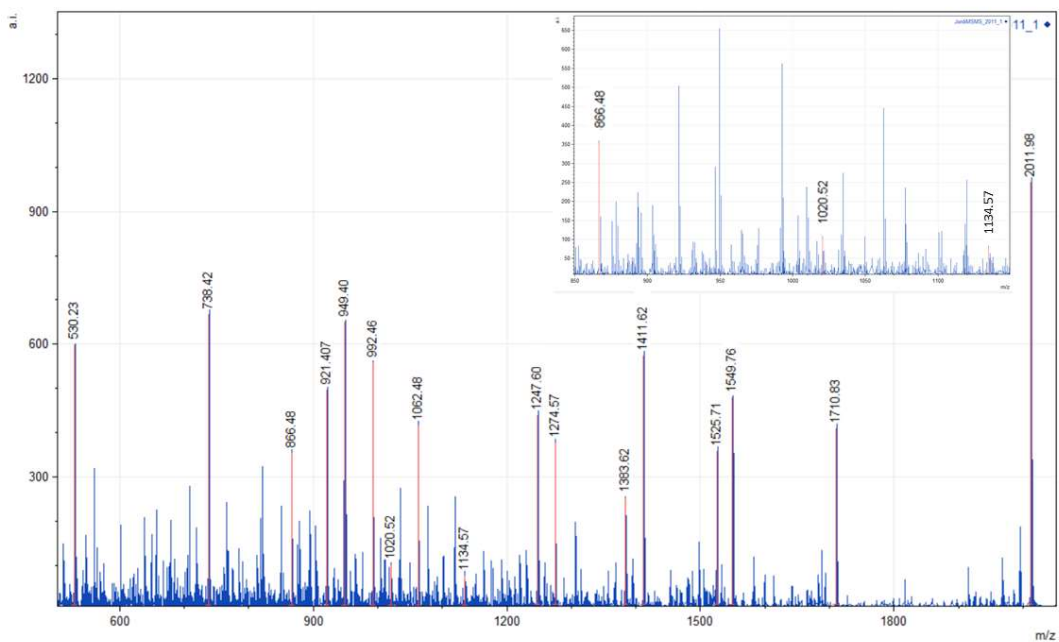

**Figure S8.** MALDI-TOF MS/MS fragmentation data showing the hydroxylated Rpl8-4-TriA216 peptide. The inset shows close up the  $y_9'$  peak; note the  $y_9'$  mass is 16 Da greater than the corresponding  $y_9'$  peak of the unmodified peptide (Figure S7).

### 3. Inhibition supporting figure

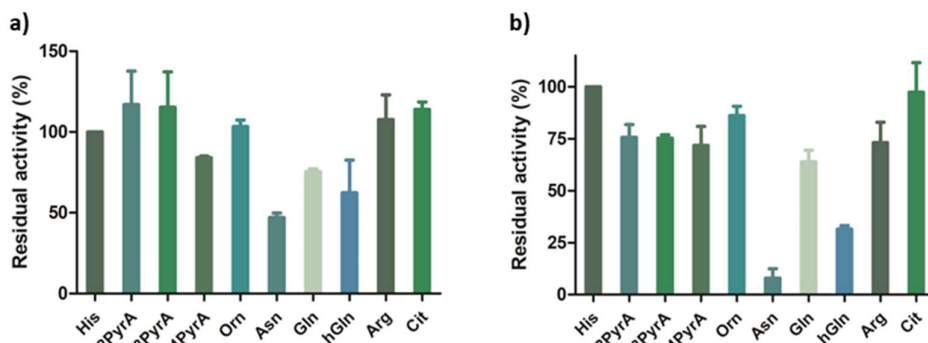

**Figure S9.** Results from NO66 inhibition at A) 5  $\mu$ M and B) 50  $\mu$ M of Rpl8-based peptides. Error bars are standard errors (SE) of duplicate analyses.

### 4. Molecular dynamics simulations

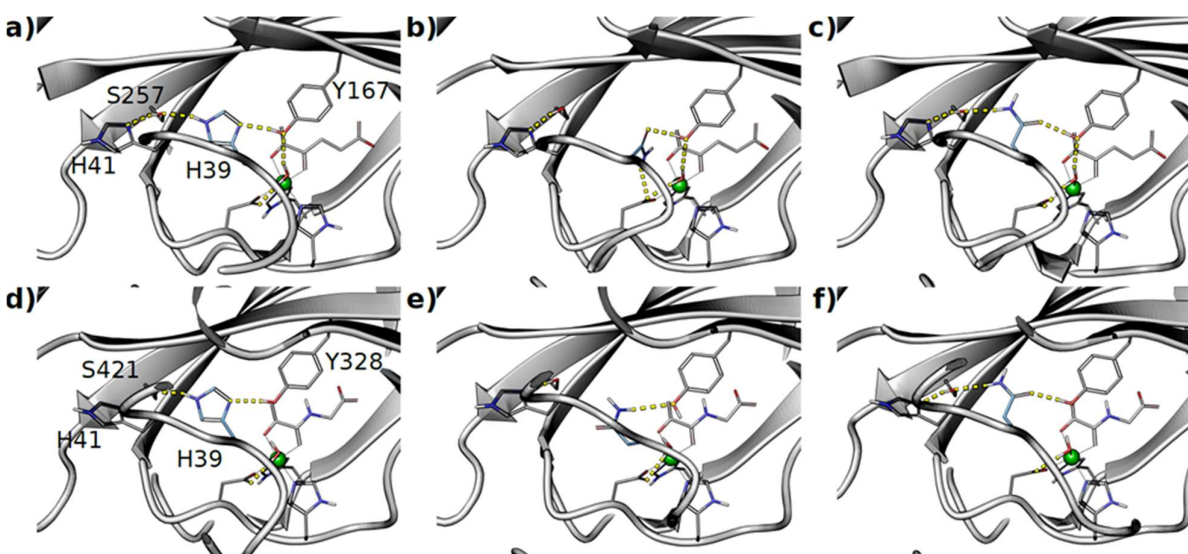

**Figure S10.** Average coordinates from the MD simulations of a-c): MINA53 and d-f) NO66 in complex with a,d) His39/His216, b,e) Asn39/Asn216 and c,f) Gln39/Gln216. Yellow dashed lines: hydrogen bonds. The simulations were based on crystal structures with PDB codes: ID 4BXF and 4Y3O.
